# Supplementary material for: Jumping without slipping: leafhoppers (Hemiptera: Cicadellidae) possess special tarsal structures for jumping from smooth surfaces
Source: PubMed Central journal article supplement (PMC5454290; doi:10.1098/rsif.2017.0022), 2017-05-03

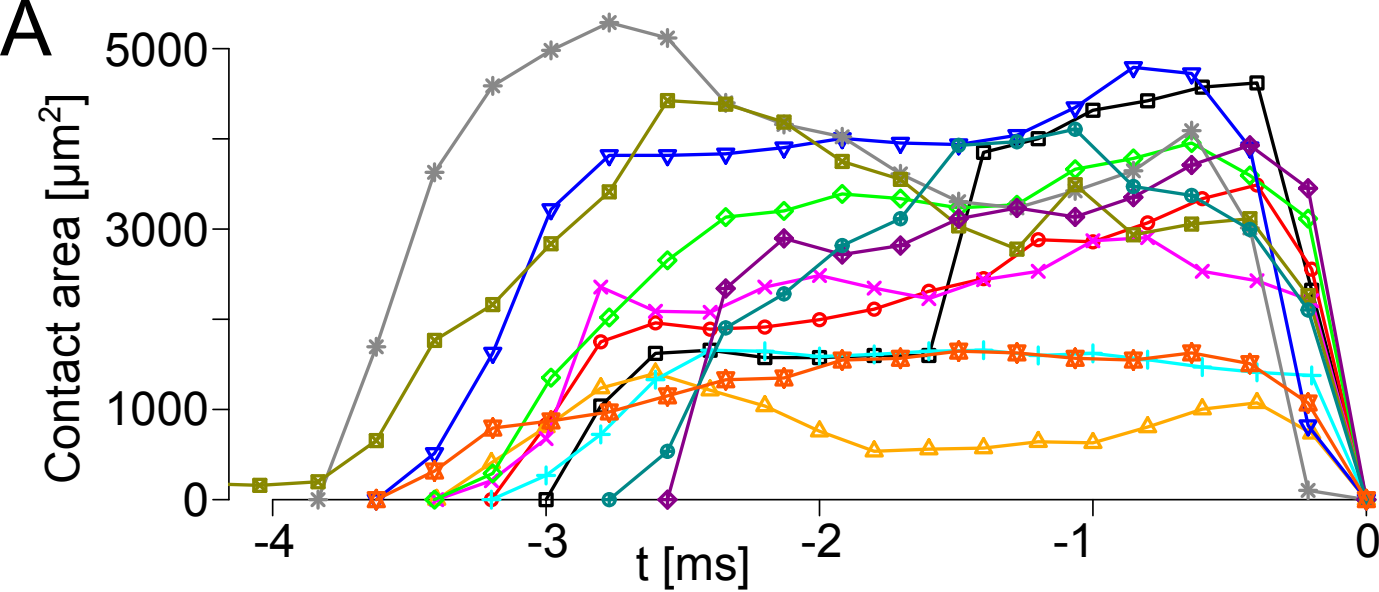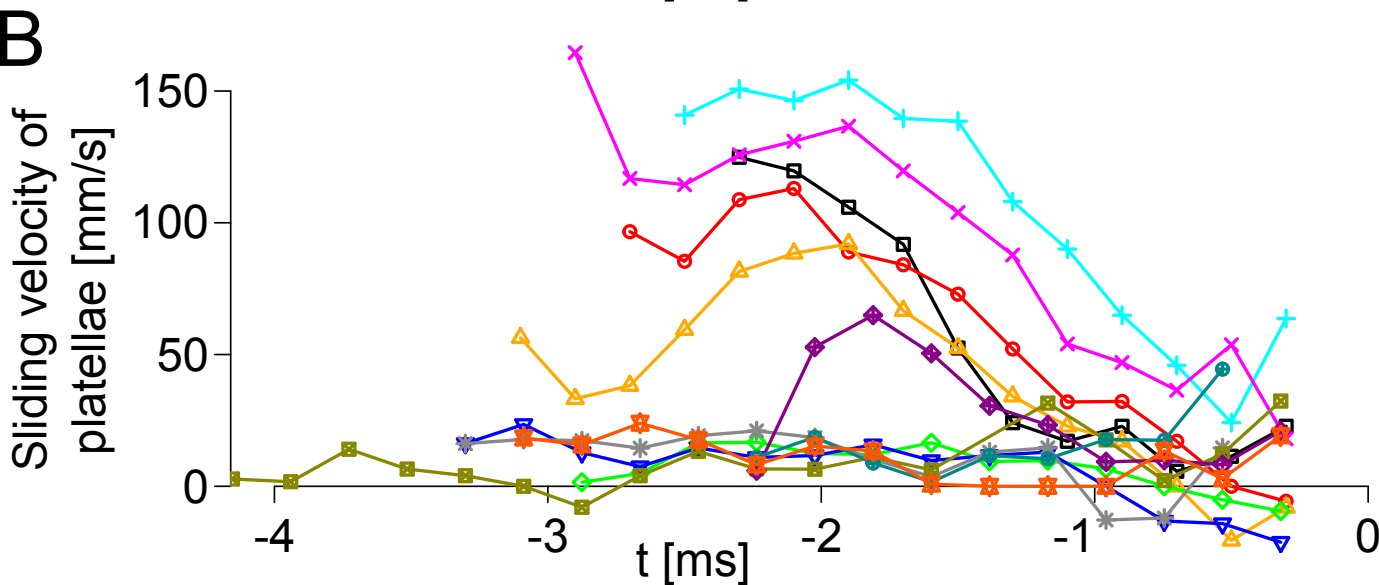

Supplement: rsif20170022supp2.pdf [file rsif20170022supp2.pdf]
