# Supplementary material for: Jumping without slipping: leafhoppers (Hemiptera: Cicadellidae) possess special tarsal structures for jumping from smooth surfaces
Source: PubMed Central journal article supplement (PMC5454290; doi:10.1098/rsif.2017.0022), 2017-05-03
Supplement: rsif20170022supp3.pdf [file rsif20170022supp3.pdf]

## Journal of the Royal Society Interface

Title: Jumping without slipping: leafhoppers (Hemiptera: Cicadellidae) possess special tarsal structures for jumping from smooth surfaces

Authors: Christofer J. Clemente, Hanns Hagen Goetzkea, James M. R. Bullock, Gregory P. Sutton, Malcolm Burrows, Walter Federle

Table 1: Results of single leg force measurements at different sliding velocities for *Aphrodes bicinctus/makarovi* leafhoppers and *Philaenus spumarius* froghoppers (slides with a normal force of 5 mN; values are mean  $\pm$  s.e.m. (N))

|                                    |                                  | Sliding velocity [mm/s]               | 0.1                   | 0.2                   | 0.5                   | 0.7                   | 1.0                   | 2.0                   | 3.0                   | 5.0                   |
|------------------------------------|----------------------------------|---------------------------------------|-----------------------|-----------------------|-----------------------|-----------------------|-----------------------|-----------------------|-----------------------|-----------------------|
| <i>Aphrodes bicinctus/makarovi</i> | <b>Pushing direction</b>         | Friction [mN]                         | 0.64 $\pm$ 0.05(4)    | 0.71 $\pm$ 0.07(4)    | 0.90 $\pm$ 0.02(4)    | 1.04 $\pm$ 0.03(4)    | 1.39 $\pm$ 0.13(4)    | 2.47 $\pm$ 0.17(4)    | 3.35 $\pm$ 0.27(4)    | 5.01 $\pm$ 0.48(4)    |
|                                    |                                  | Contact area [ $\mu\text{m}^2$ ]      | 1591.3 $\pm$ 279.2(4) | 1669.9 $\pm$ 234.6(4) | 2032.8 $\pm$ 284.6(4) | 2406.5 $\pm$ 311.7(4) | 2868.4 $\pm$ 481.7(4) | 3799.3 $\pm$ 533.6(4) | 4448.6 $\pm$ 678.9(4) | 4595.8 $\pm$ 595.5(4) |
|                                    |                                  | Shear stress [kPa]                    | 456.9 $\pm$ 120.6(4)  | 474.5 $\pm$ 115.6(4)  | 475.6 $\pm$ 85.4(4)   | 447.5 $\pm$ 45.0(4)   | 533.0 $\pm$ 87.1(4)   | 672.6 $\pm$ 61.8(4)   | 785.7 $\pm$ 76.5(4)   | 1110.5 $\pm$ 72.1(4)  |
|                                    |                                  | Friction coefficient $\mu$            | 0.13                  | 0.14                  | 0.18                  | 0.21                  | 0.28                  | 0.49                  | 0.67                  | 1.00                  |
|                                    |                                  | Minimal take-off angle $\alpha$ [deg] | 82.7                  | 81.9                  | 79.8                  | 78.3                  | 74.5                  | 63.7                  | 56.2                  | 44.9                  |
| <b>Pulling direction</b>           | Friction [mN]                    | 0.62 $\pm$ 0.06(4)                    | 0.59 $\pm$ 0.09(4)    | 0.70 $\pm$ 0.09(4)    | 0.70 $\pm$ 0.12(4)    | 0.83 $\pm$ 0.06(4)    | 1.06 $\pm$ 0.07(4)    | 1.22 $\pm$ 0.15(4)    | 1.44 $\pm$ 0.22(4)    |                       |
|                                    | Contact area [ $\mu\text{m}^2$ ] | 1187.8 $\pm$ 183.7(4)                 | 1221.4 $\pm$ 179.6(4) | 1194.5 $\pm$ 180.2(4) | 1187.5 $\pm$ 251.1(4) | 1175.1 $\pm$ 153.7(4) | 1051.8 $\pm$ 208.2(4) | 1150.1 $\pm$ 223.5(4) | 905.2 $\pm$ 168.3(4)  |                       |
|                                    | Shear stress [kPa]               | 606.4 $\pm$ 187.8(4)                  | 544.3 $\pm$ 164.8(4)  | 661.9 $\pm$ 186.7(4)  | 705.1 $\pm$ 209.2(4)  | 837.5 $\pm$ 161.0(4)  | 1105.3 $\pm$ 201.3(4) | 1152.7 $\pm$ 236.3(4) | 1725.0 $\pm$ 276.6(4) |                       |
| <i>Philaenus spumarius</i>         | <b>Pushing direction</b>         | Friction [mN]                         | 0.67 $\pm$ 0.09(5)    | 0.67 $\pm$ 0.09(5)    | 0.74 $\pm$ 0.07(5)    | 0.80 $\pm$ 0.09(5)    | 0.87 $\pm$ 0.07(5)    | 1.01 $\pm$ 0.09(5)    | 1.15 $\pm$ 0.13(5)    | 1.28 $\pm$ 0.21(5)    |
|                                    |                                  | Contact area [ $\mu\text{m}^2$ ]      | 2720.4 $\pm$ 568.0(5) | 2166.1 $\pm$ 473.9(5) | 2428.5 $\pm$ 530.8(5) | 2377.6 $\pm$ 649.5(5) | 2474.5 $\pm$ 438.3(5) | 2394.0 $\pm$ 402.7(4) | 1842.1 $\pm$ 419.1(5) | 2218.2 $\pm$ 566.9(4) |
|                                    |                                  | Shear stress [kPa]                    | 322.0 $\pm$ 99.7(5)   | 365.9 $\pm$ 85.7(5)   | 367.4 $\pm$ 90.5(5)   | 495.0 $\pm$ 198.1(5)  | 455.2 $\pm$ 103.7(5)  | 446.4 $\pm$ 63.4(4)   | 749.8 $\pm$ 175.9(5)  | 619.0 $\pm$ 158.9(4)  |
|                                    |                                  | Friction coefficient $\mu$            | 0.13                  | 0.13                  | 0.15                  | 0.16                  | 0.17                  | 0.20                  | 0.23                  | 0.26                  |
|                                    |                                  | Minimal take-off angle $\alpha$ [deg] | 82.4                  | 82.4                  | 81.6                  | 80.9                  | 80.1                  | 78.6                  | 77.0                  | 75.6                  |
| <b>Pulling direction</b>           | Friction [mN]                    | 0.64 $\pm$ 0.06(5)                    | 0.65 $\pm$ 0.07(5)    | 0.72 $\pm$ 0.10(5)    | 0.77 $\pm$ 0.09(5)    | 0.79 $\pm$ 0.09(5)    | 0.91 $\pm$ 0.12(5)    | 0.97 $\pm$ 0.15(5)    | 1.14 $\pm$ 0.19(5)    |                       |
|                                    | Contact area [ $\mu\text{m}^2$ ] | 2200.3 $\pm$ 464.4(5)                 | 2094.1 $\pm$ 474.0(5) | 1854.3 $\pm$ 420.9(5) | 1715.8 $\pm$ 362.0(5) | 1953.0 $\pm$ 327.7(5) | 1184.3 $\pm$ 169.6(5) | 1138.2 $\pm$ 251.5(4) | 954.7 $\pm$ 170.3(5)  |                       |
|                                    | Shear stress [kPa]               | 357.9 $\pm$ 89.6(5)                   | 354.1 $\pm$ 56.2(5)   | 442.6 $\pm$ 61.8(5)   | 511.3 $\pm$ 84.7(5)   | 512.0 $\pm$ 63.7(5)   | 784.5 $\pm$ 53.9(5)   | 966.2 $\pm$ 85.9(4)   | 1241.8 $\pm$ 168.7(5) |                       |

Table 2: Results of single leg force measurements at different sliding velocities for *Aphrodes bicinctus/makarovi* leafhoppers and *Philaenus spumarius* froghoppers (slides with a normal force of 3 mN; values are mean  $\pm$  s.e.m. (N))

|                                    |                          | Sliding velocity [mm/s]               | 1.0                   | 3.0                   | 5.0                   |
|------------------------------------|--------------------------|---------------------------------------|-----------------------|-----------------------|-----------------------|
| <i>Aphrodes bicinctus/makarovi</i> | <b>Pushing direction</b> | Friction [mN]                         | 1.03 $\pm$ 0.17(4)    | 2.83 $\pm$ 0.44(4)    | 4.15 $\pm$ 0.44(4)    |
|                                    |                          | Contact area [ $\mu\text{m}^2$ ]      | 2492.8 $\pm$ 518.0(4) | 3750.0 $\pm$ 611.4(4) | 4040.3 $\pm$ 495.0(4) |
|                                    |                          | Shear stress [kPa]                    | 441.9 $\pm$ 57.5(4)   | 764.7 $\pm$ 33.3(4)   | 1037.6 $\pm$ 35.5(4)  |
|                                    |                          | Friction coefficient $\mu$            | 0.34                  | 0.94                  | 1.39                  |
|                                    |                          | Minimal take-off angle $\alpha$ [deg] | 71.2                  | 47.6                  | 36.4                  |
|                                    | <b>Pulling direction</b> | Friction [mN]                         | 0.61 $\pm$ 0.07(4)    | 0.84 $\pm$ 0.13(4)    | 1.12 $\pm$ 0.23(4)    |
|                                    |                          | Contact area [ $\mu\text{m}^2$ ]      | 764.4 $\pm$ 51.1(4)   | 1110.1 $\pm$ 399.0(4) | 788.4 $\pm$ 116.1(4)  |
|                                    |                          | Shear stress [kPa]                    | 799.0 $\pm$ 58.4(4)   | 923.5 $\pm$ 190.3(4)  | 1385.7 $\pm$ 153.3(4) |
| <i>Philaenus spumarius</i>         | <b>Pushing direction</b> | Friction [mN]                         | 0.70 $\pm$ 0.10(5)    | 0.91 $\pm$ 0.15(5)    | 1.03 $\pm$ 0.20(5)    |
|                                    |                          | Contact area [ $\mu\text{m}^2$ ]      | 2604.4 $\pm$ 557(4)   | 2276.6 $\pm$ 681.5(4) | 1972.6 $\pm$ 691.9(4) |
|                                    |                          | Shear stress [kPa]                    | 352.6 $\pm$ 76.2(4)   | 552.8 $\pm$ 116.9(4)  | 1303.5 $\pm$ 779.6(4) |
|                                    |                          | Friction coefficient $\mu$            | 0.23                  | 0.30                  | 0.34                  |
|                                    |                          | Minimal take-off angle $\alpha$ [deg] | 76.9                  | 73.3                  | 71.3                  |
|                                    | <b>Pulling direction</b> | Friction [mN]                         | 0.62 $\pm$ 0.08(5)    | 0.77 $\pm$ 0.13(5)    | 0.86 $\pm$ 0.13(5)    |
|                                    |                          | Contact area [ $\mu\text{m}^2$ ]      | 1869.3 $\pm$ 511.2(4) | 1082.0 $\pm$ 358.4(4) | 1002.5 $\pm$ 247.2(4) |
|                                    |                          | Shear stress [kPa]                    | 428.9 $\pm$ 96.0(4)   | 884.5 $\pm$ 116.2(4)  | 1130.1 $\pm$ 240.0(4) |

Table 3: Results of single leg force measurements at different sliding velocities for *Aphrodes bicinctus/makarovi* leafhoppers and *Philaenus spumarius* froghoppers (slides with a normal force of 1 mN; values are mean  $\pm$  s.e.m. (N))

|                                    |                          | Sliding velocity [mm/s]               | 1.0                   | 3.0                   | 5.0                   |
|------------------------------------|--------------------------|---------------------------------------|-----------------------|-----------------------|-----------------------|
| <i>Aphrodes bicinctus/makarovi</i> | <b>Pushing direction</b> | Friction [mN]                         | 0.81 $\pm$ 0.13(3)    | 2.08 $\pm$ 0.24(3)    | 2.87 $\pm$ 0.46(3)    |
|                                    |                          | Contact area [ $\mu\text{m}^2$ ]      | 2419.3 $\pm$ 463.9(3) | 3082.9 $\pm$ 278.5(3) | 2992.0 $\pm$ 456.7(3) |
|                                    |                          | Shear stress [kPa]                    | 340.2 $\pm$ 23.2(3)   | 672.8 $\pm$ 18.3(3)   | 957.3 $\pm$ 44.6(3)   |
|                                    |                          | Friction coefficient $\mu$            | 0.81                  | 2.08                  | 2.86                  |
|                                    |                          | Minimal take-off angle $\alpha$ [deg] | 51.6                  | 26.1                  | 20.0                  |
|                                    | <b>Pulling direction</b> | Friction [mN]                         | 0.36 $\pm$ 0.06(3)    | 0.63 $\pm$ 0.12(3)    | 0.75 $\pm$ 0.13(3)    |
|                                    |                          | Contact area [ $\mu\text{m}^2$ ]      | 903.9 $\pm$ 97.1(3)   | 866.7 $\pm$ 184.0(3)  | 762.2 $\pm$ 271.7(3)  |
|                                    |                          | Shear stress [kPa]                    | 837.5 $\pm$ 161.0(3)  | 1105.3 $\pm$ 201.3(3) | 1152.7 $\pm$ 236.3(3) |
| <i>Philaenus spumarius</i>         | <b>Pushing direction</b> | Friction [mN]                         | 0.40 $\pm$ 0.08(5)    | 0.62 $\pm$ 0.15(5)    | 0.71 $\pm$ 0.16(5)    |
|                                    |                          | Contact area [ $\mu\text{m}^2$ ]      | 2076.3 $\pm$ 709.5(4) | 1863.2 $\pm$ 540.1(4) | 1776.1 $\pm$ 681.5(4) |
|                                    |                          | Shear stress [kPa]                    | 311.3 $\pm$ 111.6(4)  | 450.1 $\pm$ 73.4(4)   | 713.3 $\pm$ 229.8(4)  |
|                                    |                          | Friction coefficient $\mu$            | 0.40                  | 0.62                  | 0.71                  |
|                                    |                          | Minimal take-off angle $\alpha$ [deg] | 68.8                  | 59.6                  | 56.3                  |
|                                    | <b>Pulling direction</b> | Friction [mN]                         | 0.36 $\pm$ 0.07(5)    | 0.46 $\pm$ 0.08(5)    | 0.50 $\pm$ 0.07(5)    |
|                                    |                          | Contact area [ $\mu\text{m}^2$ ]      | 1699.9 $\pm$ 567.5(4) | 893.1 $\pm$ 189.7(4)  | 1265.8 $\pm$ 531.8(4) |
|                                    |                          | Shear stress [kPa]                    | 320.0 $\pm$ 88.0(4)   | 625.8 $\pm$ 77.2(4)   | 787.5 $\pm$ 321.4(4)  |
